# Supplementary material for: Mechanism of Antigen Presentation and Specificity of Antibody Cross-Reactivity Elicited by an Oligosaccharide-Conjugate Cancer Vaccine
Source: PubMed Central journal article supplement — J Am Chem Soc. 2023 Apr 24;145(17):9840–9. doi: 10.1021/jacs.3c02003 (PMC10161213; doi:10.1021/jacs.3c02003), 2023-04-24
Supplement: ja3c02003_si_001.pdf [file ja3c02003_si_001.pdf]

# Supporting information

## Mechanism of Antigen Presentation and Specificity of Antibody Cross-reactivity Elicited by an Oligosaccharide-conjugate Cancer Vaccine

**Authors:** Szu-Wen Wang<sup>†,‡</sup>, Yi-An Ko<sup>†</sup>, Chiang-Yun Chen<sup>†</sup>, Kuo-Shiang Liao<sup>†</sup>, Yi-Hsuan Chang<sup>†,‡</sup>, Hsin-Yu Lee<sup>†</sup>, Yueh-Hsiang Yu<sup>†</sup>, Yu-Hsuan Lih<sup>†</sup>, Yang-Yu Cheng<sup>†</sup>, Heng-Hsin Lin<sup>†</sup>, Tsui-Ling Hsu<sup>†</sup>, Chung-Yi Wu<sup>†</sup>, Kuo-I Lin<sup>†,\*</sup>, Chi-Huey Wong<sup>†,§,\*</sup>

### Affiliations:

<sup>†</sup>Genomics Research Center, Academia Sinica, Taipei, 11529, Taiwan

<sup>‡</sup>Institute of Biochemical Sciences, National Taiwan University, Taipei 10617, Taiwan

<sup>§</sup>Department of Chemistry, The Scripps Research Institute, La Jolla, CA 92037, USA

\*Correspondence to: Kuo-I Lin ([kuoilin@gate.sinica.edu.tw](mailto:kuoilin@gate.sinica.edu.tw)) or Chi-Huey Wong ([wong@scripps.edu](mailto:wong@scripps.edu)).

### This PDF file includes:

Materials and Methods

Supplementary Figs. 1 to 7

Supplementary Tables 1 to 3

## 26 **Materials and Methods**

27

28 **Mice and vaccination.** Balb/c mice (8-10 weeks) were purchased from National Laboratory Animal  
29 Center, Taiwan. FUCA1 knockout (KO) mice (C57BL/6N-*Fuca1*<sup>em1(IMPC)J</sup>/Mmucd) were purchased  
30 from Mutant Mouse Resource & Research Centers at University of California, Davis, California, USA.  
31 All the mice were maintained in a specific pathogen-free environment. Eight-week-old Balb/c mice  
32 were immunized i.m. three times with 2-week intervals. Each vaccination contains 2 µg GH-DT and  
33 2 µg C34 in PBS (100 µL). Sera collected from immunized mice were subjected to glycan array  
34 analysis 10 days after the last immunization. The experimental protocol was approved by Academia  
35 Sinica's Institutional Animal Care and Utilization Committee.

36

37 **Preparation of glycan array slides.** To prepare the glycan array slides, 15 different globo-series  
38 glycans with aminopentyl linker (Supplementary Table1) were dissolved in the printing buffer (100  
39 µM glycan in 300 mM phosphate buffer with 0.005% triton X-100, pH 8.5). The prepared glycans  
40 were loaded into 96-well-plates, and 0.7 µL was printed on the NHS ester-coated glass slides  
41 (Nexterion H slide, SCHOTT, Germany). The slide was separated into 16 grids and each contained 16  
42 column × 10 rows of glycan spots as described previously.<sup>1</sup> The prepared slides were reacted in an  
43 atmosphere of 80% humidity for 2 h, dried overnight, and stored at room temperature in a drier before  
44 use.

45

46 **Serum and antibody analysis on glycan array.** Glycan array analysis was performed as described.<sup>2</sup>  
47 Briefly, the glycan array slides were blocked by Pierce<sup>TM</sup> blocking buffer (Thermo Fisher Scientific)  
48 at room temperature for 1 h, followed by washing with PBST (0.5% Tween-20 in PBS) 3 times. The  
49 slides were then incubated with sera or ch64B7 diluted with 3% BSA in PBST at room temperature  
50 for 2 h and washed with PBST for three times and then incubated with Alexa Flour 647 conjugated  
51 goat anti-mouse IgG antibody (Jackson ImmunoResearch, 2.5 µg/mL in PBST) at room temperature  
52 for 30 min. The slides were rinsed in PBST and ddH<sub>2</sub>O, centrifuged and scanned at 635 nm wavelength  
53 by microarray fluorescence chip reader (GenePix 4300A; Molecular Devices Corporation). The result  
54 was quantified and analyzed by GenePix Pro-6.0 analysis software (Axon Instruments).

55

56 **Splenic B cells, BMDCs culture, human monocyte-derived dendritic cells, and antigen treatment.**  
57 To prepare splenic B cells, spleens were homogenized with the frosted end of glass slide followed by  
58 passing through the cell strainer (BD Biosciences). RBCs were depleted by treating with RBC lysis  
59 buffer (Sigma). Splenic B cells were isolated by positive selection from splenocytes using B220  
60 microbeads by MACS (Miltenyi Biotec, 130-049-501). Bone-marrow derived dendritic cells (BMDCs)  
61 were prepared as described.<sup>3</sup> Briefly, bone marrow was isolated from mouse femurs and tibiae and  
62 treated with RBC lysis buffer (Sigma-Aldrich) to deplete RBCs. Cells were then cultured in RPMI-  
63 1640 containing 10% heat inactivated FBS (Thermo Fisher Scientific), 1% Penicillin/Streptomycin

64 (Thermo Fisher Scientific), 50  $\mu$ M 2-mercaptoethanol (Thermo Fisher Scientific), and 20 ng/mL  
65 recombinant mouse GM-CSF (eBioscience) at a density of  $2 \times 10^5$  cells/mL. The cells were  
66 supplemented with an equal volume of the complete culture medium described above at day 3 and  
67 refreshed with one-half the volume of medium at day 6. At day 8, the suspended cells were then  
68 harvested and treated with 1 mg/mL GH-DT or SSEA4-DT.

69 Human monocyte-derived dendritic cells (MoDCs) were differentiated from periphery blood  
70 mononuclear cells (PBMCs) as described.<sup>4</sup> Briefly, PBMCs were isolated from blood of healthy donor  
71 by using ficoll and centrifugation at  $700 \times g$  for 30 min. After isolation with CD14 microbeads by  
72 MACS (Miltenyi Biotec, 130-050-201), CD14<sup>+</sup> PBMCs were cultured in RPMI 1640 containing 10%  
73 heat inactivated FBS, 1% Penicillin/Streptomycin, 50  $\mu$ M 2-mercaptoethanol, 25 ng/mL human GM-  
74 CSF (R&D) and 20 ng/mL human IL-4 (R&D). The cells were supplemented with an equal volume of  
75 the complete culture medium at day 3 and incubated for 6 days. At day 8, the suspended MoDCs were  
76 then harvested. The Research Ethics Committee of Academia Sinica approved the research project to  
77 acquire peripheral blood of healthy donors from Taipei Blood Center.

78  
79 **Flow cytometry staining.** For staining SSEA3 specific B cells induced by GH-DT immunization,  
80 after blocking with Fc receptor binding inhibitor (clone: 93, eBioscience) for 20 min, splenocytes were  
81 stained with antibodies against CD3 (clone: 17A2, BV421-conjugated, Biolegend), CD19 (clone: 1D3,  
82 PECy7-conjugated, BD Biosciences), GH-BSA-CF633, SSEA3-BSA-FITC, and SSEA3-BSA-Cy3  
83 for one h. To analyze the antigen presentation by BMDCs, splenic B cells, and human MoDCs, the  
84 cells treated with GH-DT or SSEA4-DT were labeled with FITC or Alexa Fluor 488 conjugated  
85 antibodies against GH (clone VK9), SSEA3 (clone MC631, Biolegend), or SSEA4 (clone MC813-70,  
86 Biolegend). BMDCs were gated by using anti-mouse CD11c-APC antibody (clone N418, Biolegend).  
87 To analyze GH presentation by MHC II, BMDCs were incubated with indicated concentration of  
88 antibody against IA/IE (clone: M5/114, Biolegend) one h before the treatment of GH-DT. Labeled  
89 cells were analyzed using FACSCanto Flow Cytometer (BD Biosciences).

90  
91 **Single B cell isolation.** Splenocytes isolated from GH-DT immunized mice were incubated with 30  
92  $\mu$ g/mL Gb3-BSA-biotin at 4 °C for 1 h, followed by washing and incubation with anti-biotin  
93 microbeads (Miltenyi Biotec) on ice for 15 min. After washing, Gb3-BSA positive cells were  
94 negatively depleted by LS column (Miltenyi Biotec). The flow-through cells were incubated with 10  
95  $\mu$ g/mL SSEA3-BSA-biotin at 4 °C for 1 h, followed by washing and incubation with anti-biotin  
96 microbeads (Miltenyi Biotec) on ice for 15 min. SSEA3 positive cells were collected with LD column  
97 (Miltenyi Biotec) and stained with antibodies CD19 (clone: 6D5, PE-Cy7-conjugated, BioLegend),  
98 CD3 (clone: 17A2, BV421-conjugated, BioLegend) at 1:125 dilution on ice for 15 min. Propidium  
99 Iodide (BioLegend) was used at 1:1000 to exclude dead cells. Live single SSEA3-specific B cells  
100 (CD3<sup>-</sup>CD19<sup>+</sup>) were sorted into 96-well PCR plates (Applied Biosystems) containing 10  $\mu$ L/well catch  
101 buffer (10 mM Tris-HCl, pH 8, and 5 U/ $\mu$ l RNasin (Promega)) by BD FACSAria II.

102

103 **Monoclonal antibodies construction and expression.** Monoclonal antibodies construction and  
104 expression was performed according to the method described previously.<sup>5</sup> Briefly, reverse  
105 transcription-polymerase chain reaction (RT-PCR) was performed by using primers designed based on  
106 a previous publication.<sup>6</sup> PCR products were then analyzed by electrophoresis and sequencing. The Ig  
107 V and L genes were identified on IMGT (the international ImMunoGeneTics information system,  
108 [http://imgt.org/IMGT\\_vquest/input](http://imgt.org/IMGT_vquest/input)). Genes were then amplified from the second round PCR product  
109 with single gene-specific V and L gene primers containing restriction sites for cloning into the vectors  
110 containing human IgH or IgL expression backbone. The chimeric IgH and IgL expression constructs  
111 were co-transfected into Expi293 for antibody production.

112

113 **Oxidative release of glycans from carbohydrate-conjugated vaccine.** Oxidative release of  
114 conjugated glycans was performed according to the method described previously with some  
115 modification.<sup>7</sup> Briefly, NaClO was added to the membrane fractions of BMDCs to give a final  
116 concentration at 1%. The mixture was shaken at room temperature for 1 min. Formic acid at 1%  
117 concentration was used to quench the reaction. The mixture was then centrifugated at 16,000×g at 4  
118 °C for 5 min. The supernatant was passed through a Sep-Pak C18 cartridge (Waters) and washed with  
119 3 × 3 mL 0.1% formic acid. Glycans were eluted with 1 mL 20% acetonitrile and 0.1% formic acid  
120 and dried by SpeedVac evaporator. The glycans were then analyzed by LC-MS/MS (LTQ-FT or  
121 Orbitrap Fusion, Thermo Fisher Scientific).

122

123 **Membrane protein extraction.** DC membrane proteins were extracted using ProteoExtract® Native  
124 Membrane Protein Extraction Kit (Millipore) according to the manufacturer's instructions. Briefly,  
125 GHN<sub>3</sub>-DT or GH-DT treated BMDCs were scraped and washed three times with 2 mL ice cold wash  
126 buffer. The cell pellet was then suspended with 2 mL extraction buffer I, supplemented with a cocktail  
127 of protease inhibitors (Roche) and then incubated at 4 °C for 10 min. The cells were pelleted by  
128 centrifugation at 16,000×g at 4°C for 15 min. The pellet was then suspended with 500 µL extraction  
129 buffer II supplemented with the protease inhibitor cocktail and then incubated at 4 °C for 30 min. After  
130 centrifugation at 16,000×g at 4 °C for 15 min, the supernatant was transferred to a new tube for the  
131 following experiments.

132

133 **Click chemistry.** Lysates of membrane proteins isolated from GHN<sub>3</sub>-DT treated BMDCs were  
134 conjugated with an alkynyl-biotin linker by mixing with 1 mM of CuSO<sub>4</sub>, 2 mM of sodium ascorbate,  
135 0.1 mM of alkynyl-biotin and 0.1 mM tris-triazoleamine catalyst, and then incubated at room  
136 temperature overnight.

137 The extra unreacted alkynyl-biotin linker was removed by protein precipitation. 480 µL methanol  
138 and 120 µL chloroform were added to a 420 µL reaction sample, followed by addition of 320 µL  
139 ddH<sub>2</sub>O, mixed well, and then centrifuged for 5 min at 16,000×g. The upper layer was removed. The

140 sample was then added with 360  $\mu$ L methanol, mixed well, and then subjected to centrifugation for 5  
141 min at 16,000 $\times$ g. The supernatant was removed. The pellet was air dried and then resuspend with 400  
142  $\mu$ L PBST by sonication at 4  $^{\circ}$ C. After centrifugation for 5 min at 16,000 $\times$ g, the supernatant was  
143 collected for the following use. GHN<sub>3</sub> associated protein complex was then isolated using SoftLink™  
144 Soft Release Avidin Resin (Promega) according to the manufacturer's instructions. Briefly, the  
145 solution containing GHN<sub>3</sub> associated protein complex was passed through the resin packed in a mini  
146 column for three times. The resin was then washed with 5 column volumes of PBS. The protein  
147 complex was then eluted with 10% acetic acid and the sample was then dried by SpeedVac evaporator.  
148

149 **Filter-aided sample preparation.** The purified GHN<sub>3</sub> associated protein complex was applied to a 30  
150 kDa cut off filter unit (Microcon-30 kDa, Millipore), centrifuged at 14,000 $\times$ g for 10 min and then the  
151 flow-through from the collection tube was discarded. 200  $\mu$ L of urea buffer (8 M urea in 0.1 M Tris-  
152 HCl, pH 8.5) were added to the filter unit and centrifuged at 14,000 $\times$ g for 15 min. The filter unit was  
153 added with 100  $\mu$ L DTT solution (25 mM DTT in urea buffer) and then was incubated at room  
154 temperature for 10 min, followed by centrifugation at 14,000 $\times$ g for 10 min. The filter unit was then  
155 added with 100  $\mu$ L of IAA solution (50 mM iodoacetamide in urea buffer), incubated at room  
156 temperature for 10 min and centrifuged at 14,000 $\times$ g for 10 min, followed by adding 100  $\mu$ L of urea  
157 buffer. The filter unit was centrifuged at 14,000 $\times$ g for 15 min and then added with 100  $\mu$ L of 50 mM  
158 ammonium bicarbonate in water (ABC buffer), followed by centrifugation at 14,000 $\times$ g for 10 min. 40  
159  $\mu$ L of ABC buffer with trypsin (Thermo Fisher Scientific) in an enzyme/protein ratio of 1:20 were  
160 added to the filter unit and the solution was mixed well. Subsequently, the filter unit was incubated in  
161 a wet chamber at 37  $^{\circ}$ C for overnight, followed by addition of 40  $\mu$ L ABC buffer and centrifugation at  
162 14,000 $\times$ g for 10 min. The trypsin digested peptides in the flow through were collected and dried in a  
163 SpeedVac evaporator.  
164

165 **ELISA.** For IL-2 detection, CD4<sup>+</sup> cells from GH-DT or PBS immunized mice were purified by using  
166 MACS (Miltenyi Biotec, 130-104-454) and co-incubated with BMDCs at the ratio of 5:1. Forty-eight  
167 hours after stimulation with 1 mg/mL DT, GH-DT, or PBS, the IL-2 level in the supernatant was  
168 determined with BD OptEIA Mouse IL-2 ELISA Set (BD Biosciences) according to the manufacturer  
169 provided procedures.

170 To determine the binding affinity of ch64B7, GH glycan-BSA, SSEA3 glycan-BSA, or SSEA4  
171 glycan-BSA was coated on ELISA plate at the concentration of 0.2  $\mu$ g per well in 100  $\mu$ L coating  
172 buffer (0.05 M Carbonate-Bicarbonate, pH 9.6) at 4  $^{\circ}$ C for overnight. After washing 3 times with  
173 PBST, the plates were incubated with 1% BSA/PBST blocking solution at room temperature for 1  
174 hour. After 3 times washing with PBST, the plates were incubated with serially diluted ch64B7 at  
175 room temperature for 2 hours. After 5 times washing with PBST, the plates were incubated with goat-  
176 anti-human IgG-HRP (1:5000, Jackson Immuno- Research), and incubated at room temperature for 2  
177 hours. After 7 times washing with PBST, the plates were developed with 100  $\mu$ L of the TMB substrate

178 reagent set (BD) for 10 minutes at 25°C and stopped with 50 µL 2N H<sub>2</sub>SO<sub>4</sub>. The OD<sub>450</sub> was measured  
179 by SpectraMax Paradigm, Molecular Devices.

180 **Immunofluorescence staining.** BMDCs were cultured on chamber slide (ibidi) and treated with 1  
181 mg/mL GH-DT for various timepoints. The cells were then rinsed with PBS and fixed in 4%  
182 paraformaldehyde, followed by permeabilization with 0.1% Triton X-100 and blocked by 1% BSA in  
183 PBST. Anti-GH antibody (clone VK9) in blocking buffer was added and incubated with a secondary  
184 antibody (goat anti-mouse antibody conjugated with Alexa Fluor 633, Thermo Fisher Scientific). The  
185 cells were then stained with rat anti-mouse I-A/I-E antibody (clone M5/114; Alexa Fluor 594  
186 conjugated, 1:100 dilution, Biolegend) and Alexa Fluor 488 conjugated anti-SSEA3 antibody (clone  
187 MC631; 1:100 dilution, Biolegend). Fluorescent images were examined by confocal microscope  
188 (Leica TCS SP8X WLL Confocal Super resolution Microscope). To investigate the colocalization rate  
189 between GH and FUCA1 or FUCA2 in BMDCs, cells were stained with anti-GH antibody (clone VK9)  
190 and then with goat anti-mouse antibody conjugated with Alexa Fluor 633 (A21050, 1:200 dilution  
191 Thermo Fisher Scientific), and then stained with anti-FUCA1 (PA544145, 1:100 dilution, Thermo  
192 Fisher Scientific) or FUCA2 (PA570565, 1:100 dilution, Thermo Fisher Scientific) antibodies, and  
193 then with goat anti-rabbit antibody conjugated with Alexa Fluor 555 (A21428, 1:200 dilution, Thermo  
194 Fisher Scientific). In some experiments, cells were stained with Alexa Fluor 488 conjugated anti-  
195 LAMP-1 antibody (clone 1D4B; 1:100 dilution, BD) and Alexa Fluor 488-conjugated anti-transferrin  
196 receptor antibody (clone C2F2; 1:100 dilution, BD).

197  
198 **FUCA1 and FUCA2 construction and expression.** Mature mouse FUCA1 and FUCA2 genes were  
199 amplified from cDNA of mouse BMDCs using primers with restriction enzyme sites (Fuca1: forward  
200 5'-ATATATAAGCTTCTGGCTCCGCGCCGCTTCAC and reverse 5'-  
201 ATATATTCTAGATCAGTTCACCTTTGTCAGCT; Fuca2: forward 5'-  
202 ATATATAAGCTTCTTAGCTATGACCCCACTTG and reverse 5'-  
203 ATATATTCTAGATTAAATCACATTACTTAGCA). The PCR products were then cloned into the  
204 expression vector p3xFLAG-CMV-9 (Sigma-Aldrich) with FLAG tag. The expression constructs were  
205 then transfected into Expi293 cells using ExpiFectamine™ 293 Transfection Kit (Thermo Fisher  
206 Scientific). After 5~7 days, the supernatants were harvested. FUCA1 and FUCA2 were purified by  
207 passing the supernatant through anti-FLAG M2 agarose beads (Sigma-Aldrich). The beads were then  
208 washed 3 times with PBS, and proteins were eluted with 0.1 M glycine-HCl (pH = 3.4).

209  
210 **FUCA1 and FUCA2 activity test.** To investigate the effect of pH on the activity of FUCA1, 1.8  
211 nmole GH glycan was digested with 2 µg FUCA1 in 20 µl acetate buffer at the pH range from 4 to 7  
212 or in PBS. The reaction was incubated at 37 °C for 5 h. Fucose in the reactions was detected using L-  
213 Fucose Assay Kit (Megazyme). To test the ability of FUCA1 to digest GH glycan on intact GH-DT or  
214 GH-DT peptides, GH-DT was digested by FUCA1 first and then by chymotrypsin or by chymotrypsin  
215 first and then by FUCA1 in the following conditions by using filter-aided sample preparation: for

216 chymotrypsin digestion, 20 µg GH-DT or 2 µg FUCA1 digested GH-DT was incubated with 1 µg or  
217 0.1 µg chymotrypsin (Promega) at RT for 16 h; for FUCA1 digestion, 2 µg chymotrypsin digested  
218 GH-DT peptide or intact GH-DT was incubated with 4 µg FUCA1 in acetate buffer (50 mM acetic  
219 acid, 5 mM MgCl<sub>2</sub>, pH=5.5) at 37 °C for 24 h. The digested peptides were then analyzed by LC-MS/MS.  
220

221 **Fuca1 and Fuca2 knockdown by siRNA.** siRNA targeting Fuca1-1 (mm.Ri. fuca1.13.1), Fuca1-2  
222 (mm.Ri. fuca1.13.2), Fuca1-3 (mm.Ri. fuca1.13.3), or Fuca2 (mm.Ri. fuca2.13.1) was purchased from  
223 Integrated DNA Technologies. 300 nM of siRNA targeting FUCA1, FUCA2, or control siRNA was  
224 used for each transfection which was performed by mixing siRNA with day 8 differentiated BMDCs  
225 by using Mouse Dendritic Cell Nucleofector Kit by Amaxa electroporation (program Y-01, Lonza).  
226 Transfected DCs were further cultured for 24 h in RPMI 1640 supplemented with 20 ng/mL  
227 recombinant mouse GM-CSF (eBioscience) before treatment with GH-DT.  
228

229 **Statistical analysis.** GraphPad Prism version 8 was used to conduct all statistical analysis in this study.  
230 All the data are expressed as the means ± standard errors. For all the analyses, P values were obtained  
231 from Student's t-test (unpaired, two tailed or paired t-test). Two-way ANOVA was used for multiple  
232 comparisons. p <0.05 was statistically significant. \*p < 0.05; \*\*p <0.01; \*\*\*p < 0.001; and \*\*\*\*p <  
233 0.0001.  
234  
235  
236  
237  
238  
239

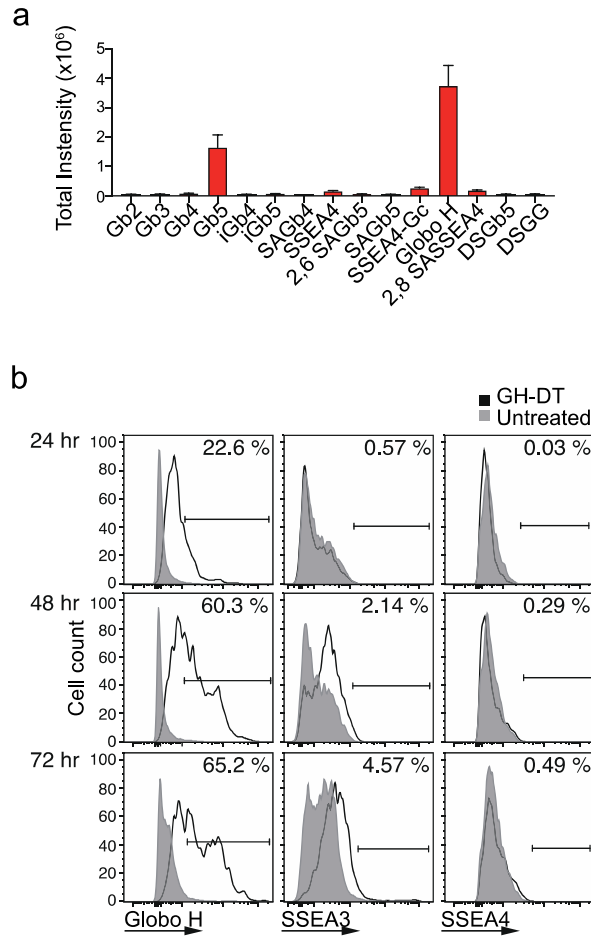

240  
241  
242  
243  
244  
245

**Figure S1.** GH-DT vaccine processing in mouse splenic B cells (a) Immunization with GH-DT/C34 in Balb/c mice induced anti-serum against GH, SSEA3, and SSEA4 glycans, as determined by glycan array analysis (n=10). (b) Mouse splenic B cells presented GH glycan or a very low level of SSEA3 glycan, but not SSEA4 glycan, on the cell surface 24 h, 48 h, and 72 h after GH-DT treatment.



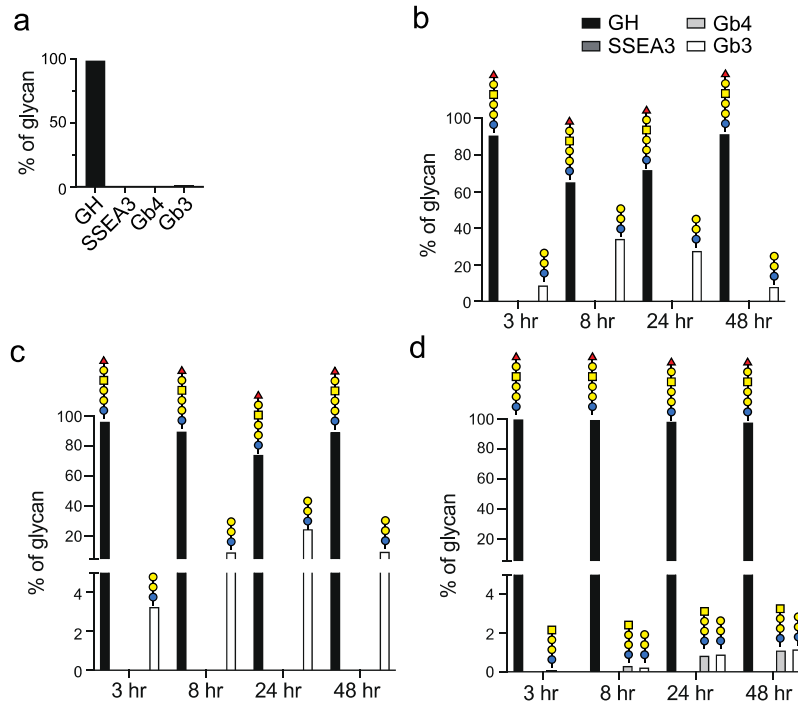

246

247 **Figure S2.** Oxidative release of globo-series glycan analyzed by LC-MS/MS. (a) Glycan released from  
 248 GH-DT vaccine. Glycan released from soluble fraction (b), membrane fraction (c), or condition  
 249 medium (d), of BMDC treated with GH-DT.

250

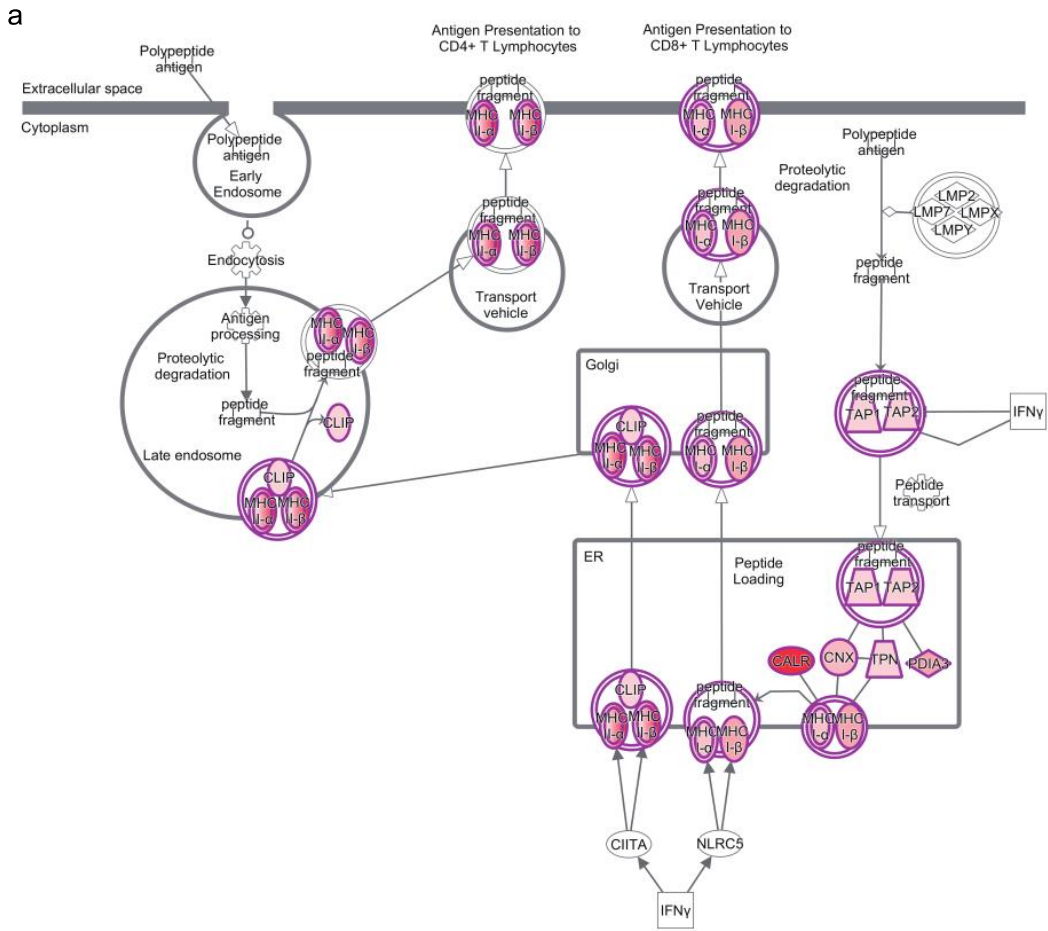

252 b

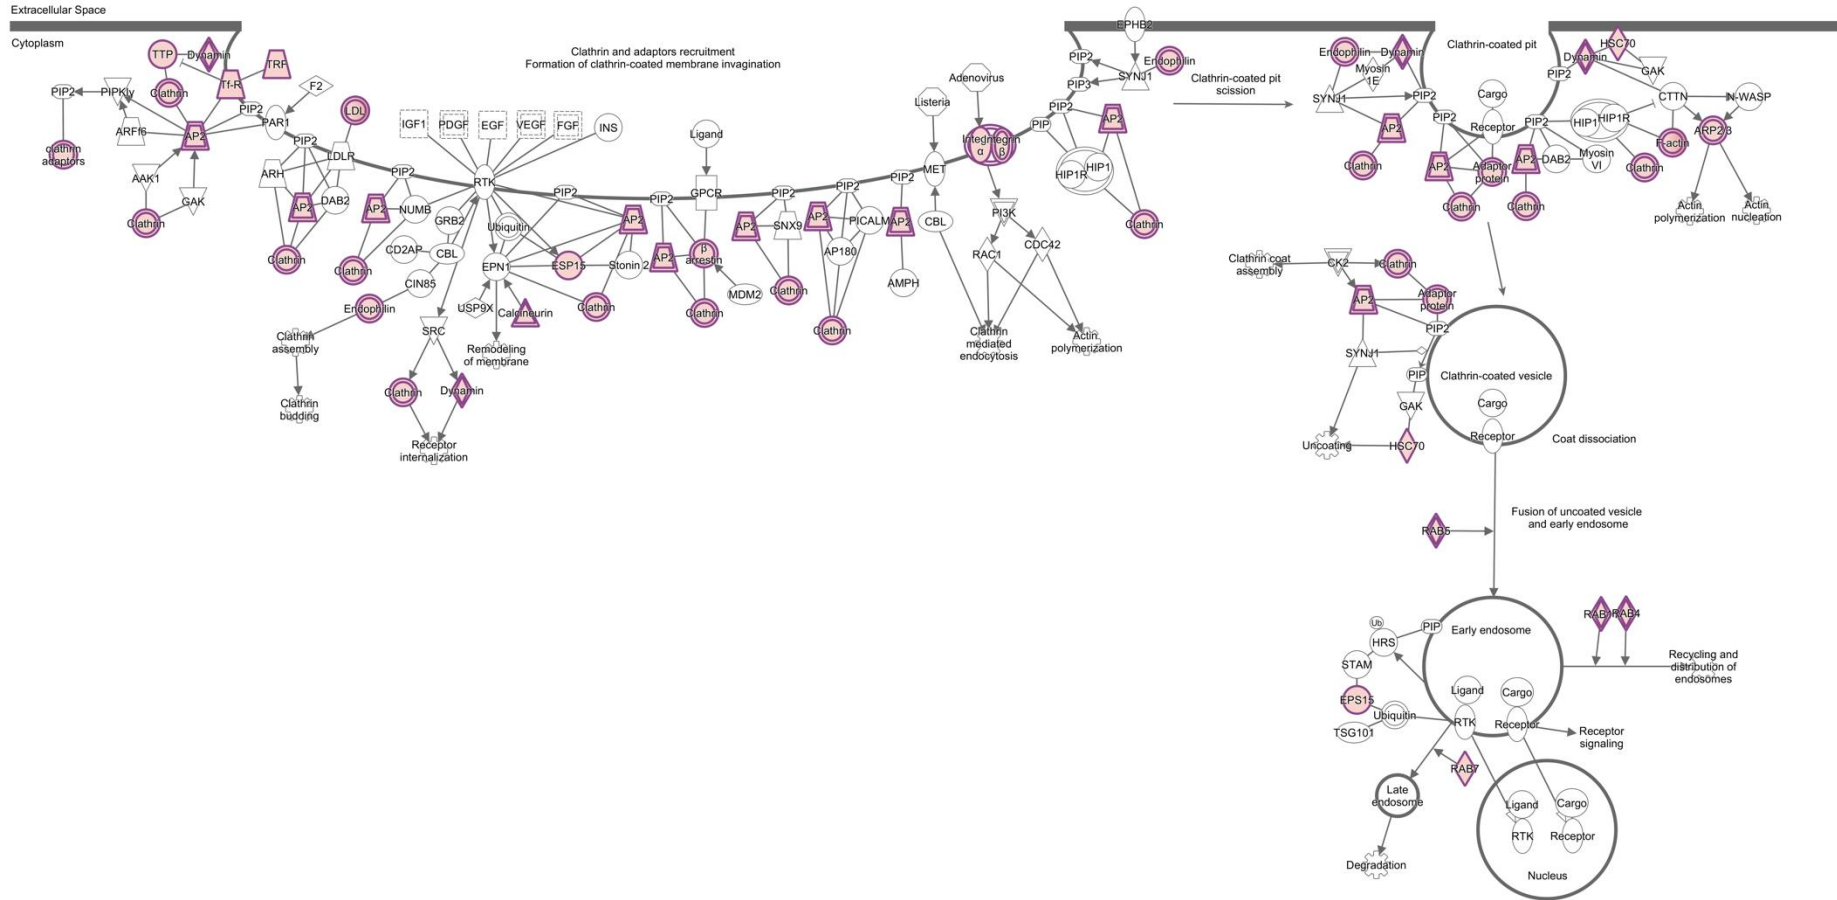

253

C

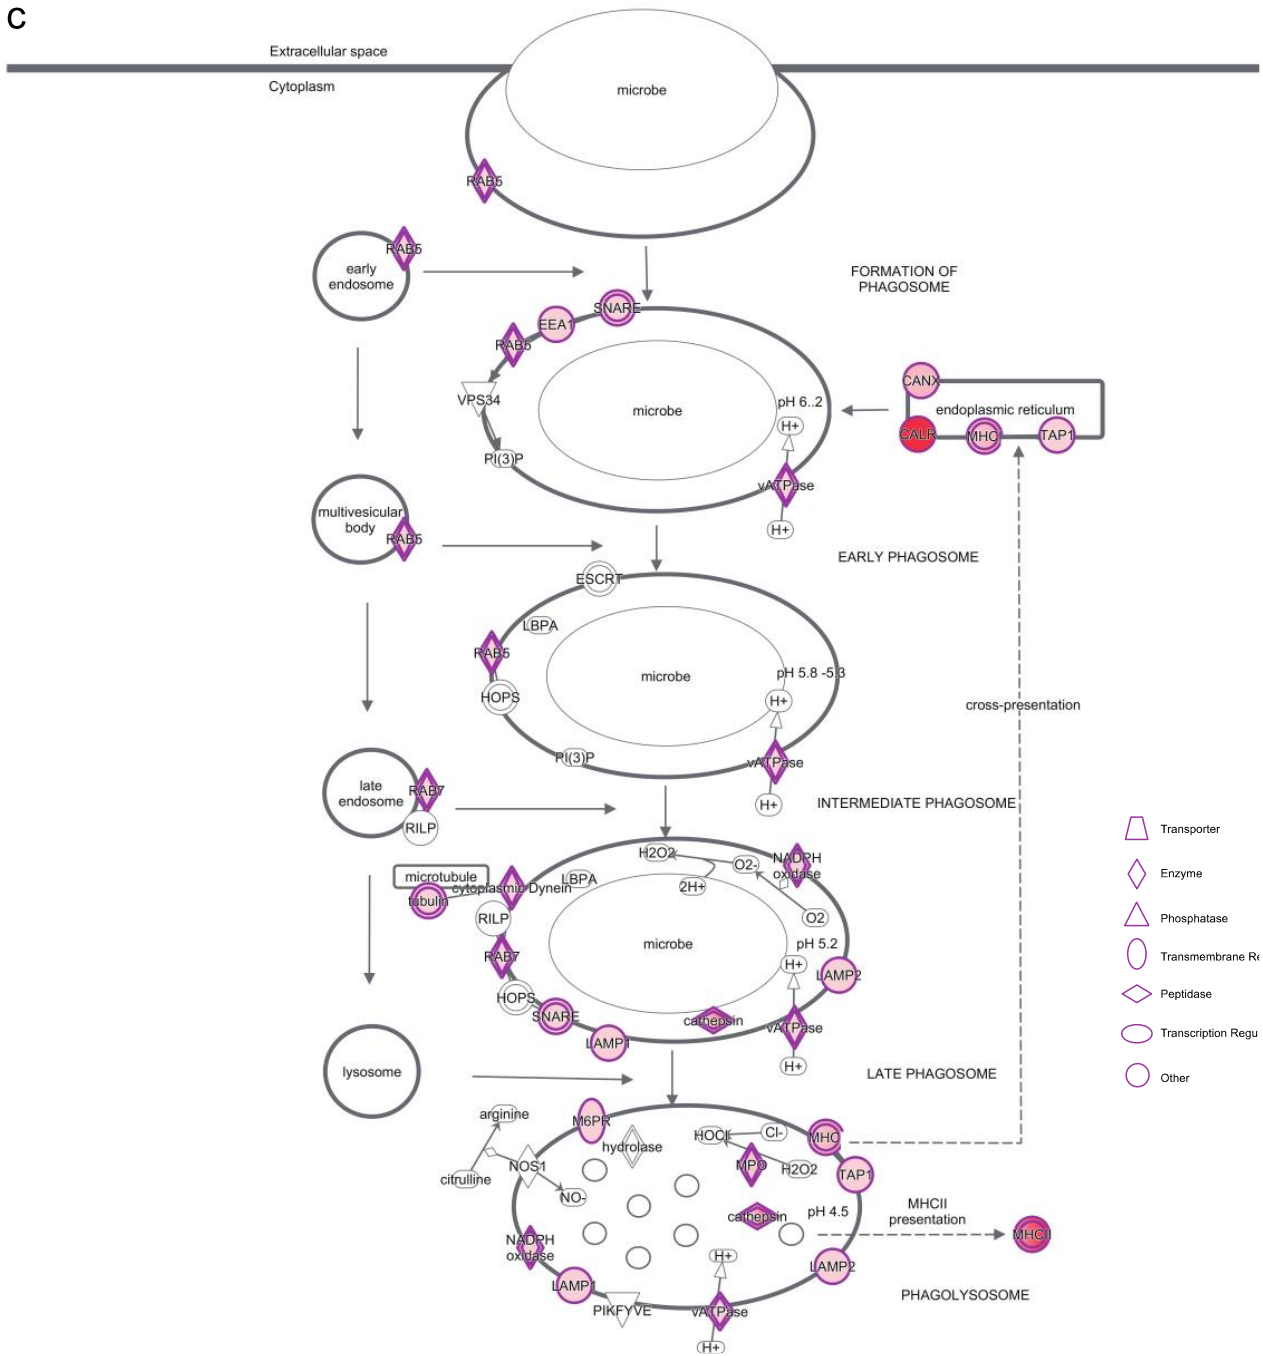

254

255 **Figure S3.** Identification of proteins interacting with GHN3 and intermediates. (a) antigen  
 256 presentation pathway, (b) Clathrin-mediated endocytosis signaling, and (c) Phagosome maturation.  
 257 Identified proteins were labeled in pink. The deeper color represents the proteins identified with higher  
 258 intensity.

259

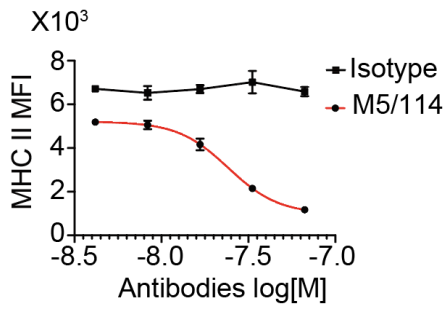

260

261 **Figure S4.** FACS analysis of MHC II on BMDCs (n = 3) 24 h after various doses of anti-MHC II  
262 antibody or rat IgG2b isotype control treatment, showing the level of surface MHC II is reduced.

263

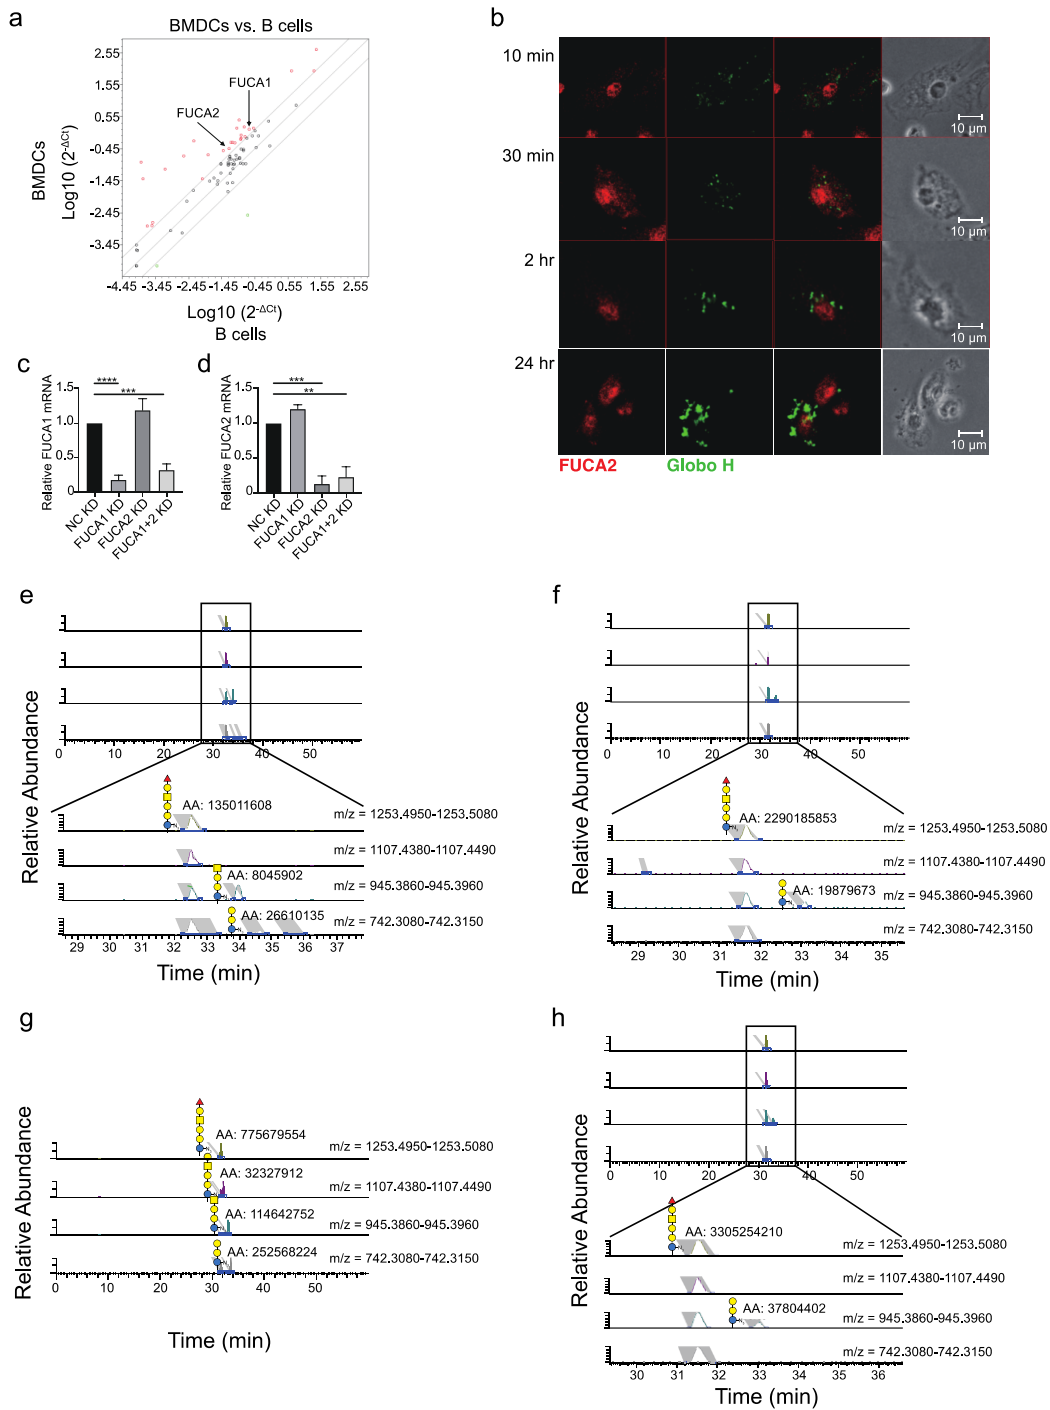

264

265 **Figure S5.** GH processing is initiated by FUCA1 in DCs (a) Compared with splenic B cells, BMDCs  
 266 treated with GH-DT expressed higher levels of FUCA1 and FUCA2 mRNA. The abbreviation deltaCt  
 267 is the Ct (threshold cycle) of target gene minus the Ct of control gene, HSP90AB1 (Heat shock protein  
 268 HSP 90-beta). (b) Confocal microscope analysis showing that FUCA2 (red) and GH glycan (green)  
 269 were rarely colocalized. (c, d) RT-qPCR showing the knockdown efficiency of siRNA against FUCA1  
 270 or FUCA2, or both. FUCA1 (c) or FUCA2 (d) mRNA were analyzed by RT-qPCR. NC represents  
 271 negative control. (e-h) LC-MS/MS showing the glycan released from GHN<sub>3</sub>-DT treated, control

272 siRNA (**e**), FUCA1 siRNA (**f**), FUCA2 siRNA (**g**), or both FUCA1 and FUCA2 siRNAs (**h**)  
273 transfected BMDCs.  
274

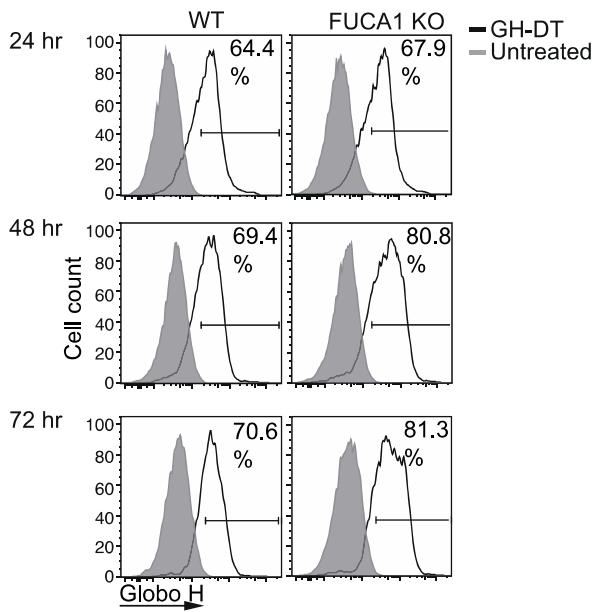

275

276

277 **Figure S6.** Knockout of FUCA1 in BMDCs presented more GH on cell surface as compared to WT  
 278 BMDCs. BMDCs with FUCA1-KO were treated with GH-DT and analyzed using FACSCanto II and  
 279 the acquired data were treated with FlowJo (ver.10.5.0).



A

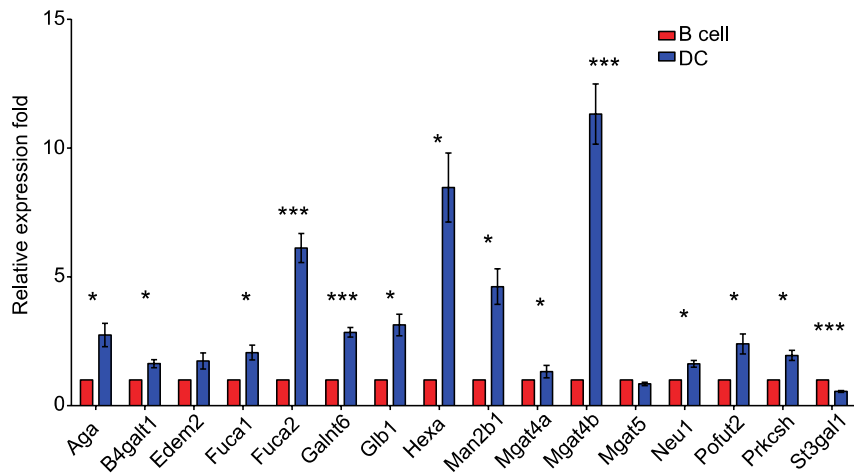

B

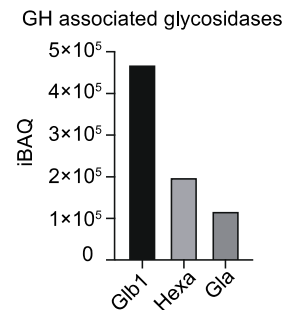

280

281 **Figure S7.** Glycosidase gene expression or association with GH glycan. (a) Glycosidase or glycosyl  
 282 transferase gene expression in mouse splenic B cells or BMDCs. (b) Level of GH-associated  
 283 glycosidases that may involve in GH glycan degradation. Aga, aspartylglucosaminidase; B4galt1,  
 284 beta-1,4-galactosyltransferase; Edem2, ER degradation-enhancing alpha-mannosidase-like protein 2;  
 285 Fuca1, Alpha-L-Fucosidase 1; Fuca2, Alpha-L-fucosidase 2; Galnt6, Polypeptide N-  
 286 Acetylgalactosaminyltransferase 6; Glb1, beta-galactosidase; Hexa, beta-hexosaminidase A; Man2b1,  
 287 Lysosomal alpha-mannosidase; Mgat4a, Alpha-1,3-mannosyl-glycoprotein 4-beta-N-  
 288 acetylglucosaminyltransferase A; Mgat4b, Alpha-1,3-mannosyl-glycoprotein 4-beta-N-  
 289 acetylglucosaminyltransferase B; Mgat5, Alpha-1,6-mannosylglycoprotein 6-beta-N-  
 290 acetylglucosaminyltransferase A; Neu1, Neuraminidase-1; Pofut2, GDP-fucose protein O-  
 291 fucosyltransferase 2; Prkcsb, Glucosidase 2 subunit beta; St3gal1, CMP-N-acetylneuramate-beta-  
 292 galactosamide-alpha-2,3-sialyltransferase 1.

293

| No. | Glycan    | Molecular weight | Structure |
|-----|-----------|------------------|-----------|
| 1   | SSEA-4    | 1245.5566        |           |
| 2   | SSEA4-Gc  | 1261.5515        |           |
| 3   | SASSEA4   | 1536.6520        |           |
| 4   | DSGb5     | 1536.6520        |           |
| 5   | SAGb5     | 1245.5566        |           |
| 6   | SAGb4     | 1084.0400        |           |
| 7   | 2,6 SAGb5 | 1245.5566        |           |
| 8   | DSGG      | 1536.6520        |           |
| 9   | i-Gb5     | 954.4612         |           |
| 10  | Gb5       | 954.4612         |           |
| 11  | Gb4       | 792.4084         |           |
| 12  | Gb3       | 589.3290         |           |
| 13  | Gb2       | 427.2762         |           |
| 14  | GH        | 1100.5191        |           |
| 15  | TF        | 468.3028         |           |
| 16  |           | 630.3556         |           |
| 17  | i-Gb4     | 792.4084         |           |
| 18  | i-GH      | 1100.5191        |           |
| 19  | i-SSEA4   | 1245.5566        |           |

297 **Table S2.** Plasma membrane proteins associated with GH

| Rank | iBAQ*     | Symbol   | Entrez Gene Name                                       | Type(s)                |
|------|-----------|----------|--------------------------------------------------------|------------------------|
| 1    | 166930000 | HLA-DQA1 | major histocompatibility complex, class II, DQ alpha 1 | transmembrane receptor |
| 2    | 30856000  | HLA-DQB1 | major histocompatibility complex, class II, DQ beta 1  | other                  |
| 3    | 29156000  | HLA-DRB5 | major histocompatibility complex, class II, DR beta 5  | transmembrane receptor |
| 4    | 15148000  | HLA-DRA  | major histocompatibility complex, class II, DR alpha   | transmembrane receptor |
| 5    | 8920600   | B2M      | beta-2-microglobulin                                   | transmembrane receptor |
| 6    | 5508100   | HLA-A    | major histocompatibility complex, class I, A           | other                  |
| 7    | 5170700   | LGALS3BP | galectin 3 binding protein                             | transmembrane receptor |
| 8    | 4389000   | CD14     | CD14 molecule                                          | transmembrane receptor |
| 9    | 4166800   | Cdc42    | cell division cycle 42                                 | enzyme                 |
| 10   | 3875500   | CR1L     | complement C3b/C4b receptor 1 like                     | other                  |
| 11   | 3669400   | HLA-DMA  | major histocompatibility complex, class II, DM alpha   | transmembrane receptor |
| 12   | 3343000   | LAMP1    | lysosomal associated membrane protein 1                | other                  |
| 13   | 3164600   | HLA-DMB  | major histocompatibility complex, class II, DM beta    | transmembrane receptor |
| 14   | 3049900   | IFITM3   | interferon induced transmembrane protein 3             | other                  |
| 15   | 3041200   | CD74     | CD74 molecule                                          | transmembrane receptor |
| 16   | 2983100   | CD63     | CD63 molecule                                          | other                  |
| 17   | 2805100   | ITGB2    | integrin subunit beta 2                                | transmembrane receptor |
| 18   | 2455700   | CD47     | CD47 molecule                                          | transmembrane receptor |
| 19   | 2432000   | HLA-A    | major histocompatibility complex, class I, A           | other                  |
| 20   | 2258800   | GNAI2    | G protein subunit alpha i2                             | enzyme                 |
| 21   | 2222300   | CD9      | CD9 molecule                                           | other                  |
| 22   | 1988800   | GPNMB    | glycoprotein nmb                                       | enzyme                 |
| 23   | 1965800   | ANPEP    | alanyl aminopeptidase, membrane                        | peptidase              |
| 24   | 1896600   | ICAM1    | intercellular adhesion molecule 1                      | transmembrane receptor |
| 25   | 1856200   | ITGAM    | integrin subunit alpha M                               | transmembrane receptor |

|    |         |          |                                                                             |                            |
|----|---------|----------|-----------------------------------------------------------------------------|----------------------------|
| 26 | 1739100 | LAMP2    | lysosomal associated membrane protein 2                                     | enzyme                     |
| 27 | 1588200 | RAP2B    | RAP2B, member of RAS oncogene family                                        | enzyme                     |
| 28 | 1586400 | PGRMC1   | progesterone receptor membrane component 1                                  | transmembrane receptor     |
| 29 | 1575900 | ANXA2    | annexin A2                                                                  | other                      |
| 30 | 1574200 | STX7     | syntaxin 7                                                                  | transporter                |
| 31 | 1542800 | CD36     | CD36 molecule                                                               | transmembrane receptor     |
| 32 | 1523600 | ALOX5AP  | arachidonate 5-lipoxygenase activating protein                              | other                      |
| 33 | 1419400 | CD44     | CD44 molecule (Indian blood group)                                          | other                      |
| 34 | 1404500 | GNB2     | G protein subunit beta 2                                                    | enzyme                     |
| 35 | 1371500 | CD68     | CD68 molecule                                                               | other                      |
| 36 | 1285100 | TMEM14C  | transmembrane protein 14C                                                   | other                      |
| 37 | 1214000 | LRPAP1   | LDL receptor related protein associated protein 1                           | other                      |
| 38 | 1209600 | CCR7     | C-C motif chemokine receptor 7                                              | G-protein coupled receptor |
| 39 | 1126400 | LGALS3BP | galectin 3 binding protein                                                  | transmembrane receptor     |
| 40 | 1116200 | MSN      | moesin                                                                      | other                      |
| 41 | 1101300 | CLTA     | clathrin light chain A                                                      | other                      |
| 42 | 1022900 | PDCD1LG2 | programmed cell death 1 ligand 2                                            | enzyme                     |
| 43 | 1000000 | ACTR3    | actin related protein 3                                                     | other                      |
| 44 | 994390  | TCIRG1   | T cell immune regulator 1, ATPase H <sup>+</sup> transporting V0 subunit a3 | enzyme                     |
| 45 | 989640  | ACTR2    | actin related protein 2                                                     | other                      |
| 46 | 979890  | GNG12    | G protein subunit gamma 12                                                  | enzyme                     |
| 47 | 929740  | MLEC     | malectin                                                                    | other                      |
| 48 | 890220  | HLA-A    | major histocompatibility complex, class I, A                                | other                      |
| 49 | 882160  | SLC9A3R1 | SLC9A3 regulator 1                                                          | other                      |
| 50 | 881210  | SNAP23   | synaptosome associated protein 23                                           | transporter                |
| 51 | 819630  | CD40     | CD40 molecule                                                               | transmembrane receptor     |
| 52 | 806690  | CD48     | CD48 molecule                                                               | other                      |

|    |        |         |                                                                    |                            |
|----|--------|---------|--------------------------------------------------------------------|----------------------------|
| 53 | 769270 | ITGB1   | integrin subunit beta 1                                            | transmembrane receptor     |
| 54 | 727180 | VAMP3   | vesicle associated membrane protein 3                              | other                      |
| 55 | 683350 | CLEC10A | C-type lectin domain containing 10A                                | other                      |
| 56 | 679460 | Olf1216 | olfactory receptor 1216                                            | G-protein coupled receptor |
| 57 | 573080 | ABHD12  | abhydrolase domain containing 12                                   | enzyme                     |
| 58 | 567090 | GNG2    | G protein subunit gamma 2                                          | enzyme                     |
| 59 | 559340 | SEC61G  | SEC61 translocon gamma subunit                                     | transporter                |
| 60 | 548020 | GNG5    | G protein subunit gamma 5                                          | other                      |
| 61 | 510680 | VAMP8   | vesicle associated membrane protein 8                              | transporter                |
| 62 | 486240 | NCEH1   | neutral cholesterol ester hydrolase 1                              | enzyme                     |
| 63 | 481450 | STX8    | syntaxin 8                                                         | other                      |
| 64 | 479280 | VAT1    | vesicle amine transport 1                                          | transporter                |
| 65 | 469820 | ANXA5   | annexin A5                                                         | transporter                |
| 66 | 450530 | SLC2A6  | solute carrier family 2 member 6                                   | transporter                |
| 67 | 432340 | SCARB2  | scavenger receptor class B member 2                                | transmembrane receptor     |
| 68 | 422580 | Marcks  | myristoylated alanine rich protein kinase C substrate              | other                      |
| 69 | 403780 | LEPROT  | leptin receptor overlapping transcript                             | other                      |
| 70 | 397840 | PTPRC   | protein tyrosine phosphatase receptor type C                       | phosphatase                |
| 71 | 390820 | NCSTN   | nicastrin                                                          | peptidase                  |
| 72 | 381760 | CNPY2   | canopy FGF signaling regulator 2                                   | other                      |
| 73 | 374340 | PILRA   | paired immunoglobulin like type 2 receptor alpha                   | other                      |
| 74 | 371510 | PLSCR1  | phospholipid scramblase 1                                          | enzyme                     |
| 75 | 350990 | ATP1B3  | ATPase Na <sup>+</sup> /K <sup>+</sup> transporting subunit beta 3 | transporter                |
| 76 | 349510 | VAPA    | VAMP associated protein A                                          | other                      |
| 77 | 331510 | ITGA5   | integrin subunit alpha 5                                           | transmembrane receptor     |
| 78 | 327610 | SIRPA   | signal regulatory protein alpha                                    | phosphatase                |
| 79 | 317950 | NTRK2   | neurotrophic receptor tyrosine kinase 2                            | kinase                     |

|     |        |         |                                                                     |                        |
|-----|--------|---------|---------------------------------------------------------------------|------------------------|
| 80  | 316060 | CD81    | CD81 molecule                                                       | other                  |
| 81  | 296840 | STOM    | stomatin                                                            | other                  |
| 82  | 275340 | DNAJC5  | DnaJ heat shock protein family (Hsp40) member C5                    | other                  |
| 83  | 272430 | ATP1A1  | ATPase Na <sup>+</sup> /K <sup>+</sup> transporting subunit alpha 1 | transporter            |
| 84  | 261980 | SLC3A2  | solute carrier family 3 member 2                                    | transporter            |
| 85  | 258750 | KRTCAP2 | keratinocyte associated protein 2                                   | enzyme                 |
| 86  | 255590 | ARL8B   | ADP ribosylation factor like GTPase 8B                              | enzyme                 |
| 87  | 244080 | STOML2  | stomatin like 2                                                     | other                  |
| 88  | 238470 | ATP6V1A | ATPase H <sup>+</sup> transporting V1 subunit A                     | transporter            |
| 89  | 234200 | DPP4    | dipeptidyl peptidase 4                                              | peptidase              |
| 90  | 232480 | LY6E    | lymphocyte antigen 6 family member E                                | other                  |
| 91  | 229670 | SIGMAR1 | sigma non-opioid intracellular receptor 1                           | transmembrane receptor |
| 92  | 226520 | LAMTOR1 | late endosomal/lysosomal adaptor, MAPK and MTOR activator 1         | other                  |
| 93  | 219350 | Bst2    | bone marrow stromal cell antigen 2                                  | other                  |
| 94  | 219130 | EMB     | embigin                                                             | other                  |
| 95  | 214400 | KCTD12  | potassium channel tetramerization domain containing 12              | ion channel            |
| 96  | 211430 | L1CAM   | L1 cell adhesion molecule                                           | other                  |
| 97  | 199860 | HOMER1  | homer scaffold protein 1                                            | other                  |
| 98  | 195390 | RRAS2   | RAS related 2                                                       | enzyme                 |
| 99  | 193870 | STT3A   | STT3 oligosaccharyltransferase complex catalytic subunit A          | enzyme                 |
| 100 | 192430 | SYPL1   | synaptophysin like 1                                                | transporter            |
| 101 | 186520 | P2RX4   | purinergic receptor P2X 4                                           | ion channel            |
| 102 | 185640 | SIRPA   | signal regulatory protein alpha                                     | phosphatase            |
| 103 | 172070 | CD180   | CD180 molecule                                                      | other                  |
| 104 | 170800 | TMEM165 | transmembrane protein 165                                           | other                  |
| 105 | 170360 | CLTC    | clathrin heavy chain                                                | other                  |
| 106 | 162370 | GNB1    | G protein subunit beta 1                                            | enzyme                 |

|     |        |         |                                                              |                        |
|-----|--------|---------|--------------------------------------------------------------|------------------------|
| 107 | 159730 | TSPAN31 | tetraspanin 31                                               | other                  |
| 108 | 158110 | ALCAM   | activated leukocyte cell adhesion molecule                   | other                  |
| 109 | 150340 | ITM2B   | integral membrane protein 2B                                 | other                  |
| 110 | 142010 | SYPL1   | synaptophysin like 1                                         | transporter            |
| 111 | 141470 | CD84    | CD84 molecule                                                | other                  |
| 112 | 140680 | TBXAS1  | thromboxane A synthase 1                                     | enzyme                 |
| 113 | 130290 | TNFRSF9 | TNF receptor superfamily member 9                            | transmembrane receptor |
| 114 | 128620 | ANXA4   | annexin A4                                                   | other                  |
| 115 | 127540 | TSPAN13 | tetraspanin 13                                               | other                  |
| 116 | 126580 | BST1    | bone marrow stromal cell antigen 1                           | enzyme                 |
| 117 | 122200 | DEGS1   | delta 4-desaturase, sphingolipid 1                           | enzyme                 |
| 118 | 121090 | Ap2b1   | adaptor-related protein complex 2, beta 1 subunit            | other                  |
| 119 | 121050 | EPS15L1 | epidermal growth factor receptor pathway substrate 15 like 1 | other                  |
| 120 | 120450 | PDGFRB  | platelet derived growth factor receptor beta                 | kinase                 |
| 121 | 109460 | CD80    | CD80 molecule                                                | transmembrane receptor |
| 122 | 106680 | TM9SF2  | transmembrane 9 superfamily member 2                         | transporter            |
| 123 | 105200 | Nptn    | neuroplastin                                                 | other                  |
| 124 | 99945  | LY75    | lymphocyte antigen 75                                        | transmembrane receptor |
| 125 | 88045  | PPIL1   | peptidylprolyl isomerase like 1                              | enzyme                 |
| 126 | 86164  | Clec2d  | C-type lectin domain family 2, member d                      | transmembrane receptor |
| 127 | 84999  | FCGRT   | Fc fragment of IgG receptor and transporter                  | transmembrane receptor |
| 128 | 81611  | SLC18A2 | solute carrier family 18 member A2                           | transporter            |
| 129 | 79915  | LRP1    | LDL receptor related protein 1                               | transmembrane receptor |
| 130 | 76473  | SLC2A1  | solute carrier family 2 member 1                             | transporter            |
| 131 | 76140  | RAB8A   | RAB8A, member RAS oncogene family                            | enzyme                 |
| 132 | 75529  | ITGAL   | integrin subunit alpha L                                     | transmembrane receptor |
| 133 | 74806  | FXVD5   | FXVD domain containing ion transport regulator 5             | ion channel            |

|     |       |         |                                                                  |                            |
|-----|-------|---------|------------------------------------------------------------------|----------------------------|
| 134 | 67733 | CD83    | CD83 molecule                                                    | transmembrane receptor     |
| 135 | 67191 | LPCAT3  | lysophosphatidylcholine acyltransferase 3                        | enzyme                     |
| 136 | 67171 | FPR2    | formyl peptide receptor 2                                        | G-protein coupled receptor |
| 137 | 66583 | CLEC6A  | C-type lectin domain containing 6A                               | transmembrane receptor     |
| 138 | 66228 | TRPV2   | transient receptor potential cation channel subfamily V member 2 | ion channel                |
| 139 | 61605 | TM6SF1  | transmembrane 6 superfamily member 1                             | other                      |
| 140 | 59298 | ADPGK   | ADP dependent glucokinase                                        | kinase                     |
| 141 | 57972 | ITGA1   | integrin subunit alpha 1                                         | other                      |
| 142 | 55463 | OSBPL8  | oxysterol binding protein like 8                                 | transporter                |
| 143 | 52147 | FCGR1A  | Fc fragment of IgG receptor Ia                                   | transmembrane receptor     |
| 144 | 48667 | ANXA1   | annexin A1                                                       | enzyme                     |
| 145 | 48326 | SLC7A2  | solute carrier family 7 member 2                                 | transporter                |
| 146 | 47464 | MPC2    | mitochondrial pyruvate carrier 2                                 | other                      |
| 147 | 45540 | SLC29A3 | solute carrier family 29-member 3                                | transporter                |
| 148 | 41915 | VTI1B   | vesicle transport through interaction with t-SNAREs 1B           | transporter                |
| 149 | 41871 | PCDHA3  | protocadherin alpha 3                                            | other                      |
| 150 | 40611 | ATP2B1  | ATPase plasma membrane Ca <sup>2+</sup> transporting 1           | transporter                |
| 151 | 40164 | FCGR2A  | Fc fragment of IgG receptor IIa                                  | transmembrane receptor     |
| 152 | 36524 | CD274   | CD274 molecule                                                   | enzyme                     |
| 153 | 36395 | SLAMF7  | SLAM family member 7                                             | other                      |
| 154 | 36027 | SLC39A4 | solute carrier family 39-member 4                                | transporter                |
| 155 | 35145 | RAB4B   | RAB4B, member RAS oncogene family                                | enzyme                     |
| 156 | 34836 | VTI1A   | vesicle transport through interaction with t-SNAREs 1A           | transporter                |
| 157 | 34523 | STX4    | syntaxin 4                                                       | transporter                |
| 158 | 33658 | EMC1    | ER membrane protein complex subunit 1                            | other                      |
| 159 | 33604 | CAP1    | cyclase associated actin cytoskeleton regulatory protein 1       | other                      |
| 160 | 32886 | ITGAX   | integrin subunit alpha X                                         | transmembrane receptor     |



|     |       |              |                                                              |                            |
|-----|-------|--------------|--------------------------------------------------------------|----------------------------|
| 161 | 32323 | CSF1R        | colony stimulating factor 1 receptor                         | kinase                     |
| 162 | 31810 | RFTN1        | raftlin, lipid raft linker 1                                 | other                      |
| 163 | 31340 | VASP         | vasodilator stimulated phosphoprotein                        | other                      |
| 164 | 30821 | FKBP15       | FKBP prolyl isomerase 15                                     | enzyme                     |
| 165 | 29756 | Olf1118      | olfactory receptor 1118                                      | G-protein coupled receptor |
| 166 | 29496 | ENTPD1       | ectonucleoside triphosphate diphosphohydrolase 1             | enzyme                     |
| 167 | 29088 | FAS          | Fas cell surface death receptor                              | transmembrane receptor     |
| 168 | 28066 | CD200R1      | CD200 receptor 1                                             | transmembrane receptor     |
| 169 | 26624 | LILRB3       | leukocyte immunoglobulin like receptor B3                    | transmembrane receptor     |
| 170 | 26380 | SLC12A9      | solute carrier family 12-member 9                            | transporter                |
| 171 | 24260 | ADGRE5       | adhesion G protein-coupled receptor E5                       | G-protein coupled receptor |
| 172 | 23188 | TNFRSF1B     | TNF receptor superfamily member 1B                           | transmembrane receptor     |
| 173 | 22186 | DNM2         | dynamamin 2                                                  | enzyme                     |
| 174 | 21855 | ADAM17       | ADAM metallopeptidase domain 17                              | peptidase                  |
| 175 | 21526 | MRC1         | mannose receptor C-type 1                                    | transmembrane receptor     |
| 176 | 19285 | EHD4         | EH domain containing 4                                       | enzyme                     |
| 177 | 18485 | CLPTM1       | CLPTM1 regulator of GABA type A receptor forward trafficking | other                      |
| 178 | 17864 | MPP1         | membrane palmitoylated protein 1                             | kinase                     |
| 179 | 17038 | LOC102723996 | inducible T cell costimulator ligand                         | other                      |
| 180 | 16670 | SEMA4A       | semaphorin 4A                                                | other                      |
| 181 | 15756 | ECE1         | endothelin converting enzyme 1                               | peptidase                  |
| 182 | 15581 | SPTAN1       | spectrin alpha, non-erythrocytic 1                           | other                      |
| 183 | 15252 | ABCD1        | ATP binding cassette subfamily D member 1                    | transporter                |
| 184 | 15049 | PNN          | pinin, desmosome associated protein                          | other                      |
| 185 | 14270 | STIM1        | stromal interaction molecule 1                               | ion channel                |
| 186 | 14225 | PEAR1        | platelet endothelial aggregation receptor 1                  | other                      |
| 187 | 14165 | CCR1         | C-C motif chemokine receptor 1                               | G-protein coupled receptor |

|     |        |         |                                                                |                            |
|-----|--------|---------|----------------------------------------------------------------|----------------------------|
| 188 | 9575.4 | TLR7    | toll like receptor 7                                           | transmembrane receptor     |
| 189 | 8507.9 | SLC1A5  | solute carrier family 1 member 5                               | transporter                |
| 190 | 7849.4 | EPB41L2 | erythrocyte membrane protein band 4.1 like 2                   | other                      |
| 191 | 5567.4 | PKD1    | polycystin 1, transient receptor potential channel interacting | ion channel                |
| 192 | 5484.8 | IGF2R   | insulin like growth factor 2 receptor                          | transmembrane receptor     |
| 193 | 5237.4 | CELSR3  | cadherin EGF LAG seven-pass G-type receptor 3                  | G-protein coupled receptor |
| 194 | 2060.2 | UTRN    | utrophin                                                       | transmembrane receptor     |

---

298 \* iBAQ: intensity-based absolute quantification

299 **Table S3.** Fold increase of glycosidase related gene expression in BMDCs as compared to B cells.

| <b>Gene Symbol</b> | <b>Enzyme</b>                                                            | <b>Fold Increase</b> |
|--------------------|--------------------------------------------------------------------------|----------------------|
| Aga                | Aspartylglucosaminidase                                                  | 7.3711               |
| B3gnt3             | Beta-1,3-N-Acetylglucosaminyltransferase 3                               | 273.8825             |
| B4galt1            | Beta-1,4-galactosyltransferase 1                                         | 4.8574               |
| B4galt2            | Beta-1,4-Galactosyltransferase 2                                         | 6.8326               |
| B4galt5            | Beta-1,4-galactosyltransferase 5                                         | 5.2379               |
| Edem2              | ER degradation-enhancing alpha-mannosidase-like 2                        | 7.0189               |
| Fuca1              | Alpha-L-Fucosidase 1                                                     | 5.9906               |
| Fuca2              | Alpha-L-Fucosidase 2                                                     | 8.1859               |
| Galnt3             | Polypeptide N-acetylgalactosaminyltransferase 3                          | 119.1723             |
| Galnt6             | Polypeptide N-acetylgalactosaminyltransferase 6                          | 16.5343              |
| Galnt9             | Polypeptide N-acetylgalactosaminyltransferase 9                          | 1052.1387            |
| Glb1               | Beta-galactosidase                                                       | 7.952                |
| Hexa               | Beta-hexosaminidase subunit alpha                                        | 23.5368              |
| Man1c1             | Mannosyl-oligosaccharide 1,2-alpha-mannosidase IC                        | 82.6274              |
| Man2b1             | Lysosomal alpha-mannosidase                                              | 6.1326               |
| Mgat3              | Beta-1,4-mannosyl-glycoprotein 4-beta-N-acetylglucosaminyltransferase    | 5.9512               |
| Mgat4a             | Alpha-1,3-mannosyl-glycoprotein 4-beta-N-acetylglucosaminyltransferase A | 5.5296               |
| Mgat4b             | Alpha-1,3-mannosyl-glycoprotein 4-beta-N-acetylglucosaminyltransferase B | 123.8913             |
| Mgat5              | Alpha-1,6-mannosylglycoprotein 6-beta-N-acetylglucosaminyltransferase A  | 4.4901               |
| Neu1               | Neuraminidase 1                                                          | 15.1744              |
| Pofut2             | GDP-fucose protein O-fucosyltransferase 2                                | 6.0998               |
| Prkcsb             | Glucosidase 2 subunit beta                                               | 4.6331               |
| St3gal1            | CMP-N-acetylneuraminate-beta-galactosamide-alpha-2,3-sialyltransferase 1 | 10.0218              |
| St8sia2            | Alpha-2,8-sialyltransferase 8B                                           | 5.088                |
| Galnt15            | N-acetylgalactosaminyltransferase-like protein 5                         | -5.0486              |
| St8sia6            | Alpha-2,8-sialyltransferase 8F                                           | -73.7251             |

## REFERENCES

1. Markl, F.; Huynh, D.; Endres, S.; Kobold, S., Utilizing chemokines in cancer immunotherapy. *Trends Cancer* **2022**, *8* (8), 670-682.
2. Huang, C. Y.; Thayer, D. A.; Chang, A. Y.; Best, M. D.; Hoffmann, J.; Head, S.; Wong, C. H., Carbohydrate microarray for profiling the antibodies interacting with Globo H tumor antigen. *Proc Natl Acad Sci U S A* **2006**, *103* (1), 15-20.
3. Wang, T. T.; Tan, G. S.; Hai, R.; Pica, N.; Ngai, L.; Ekiert, D. C.; Wilson, I. A.; Garcia-Sastre, A.; Moran, T. M.; Palese, P., Vaccination with a synthetic peptide from the influenza virus hemagglutinin provides protection against distinct viral subtypes. *Proc Natl Acad Sci U S A* **2010**, *107* (44), 18979-84.
4. Posch, W.; Lass-Flörl, C.; Wilflingseder, D., Generation of Human Monocyte-derived Dendritic Cells from Whole Blood. *J Vis Exp* **2016**, *118*, e54968.
5. Huang, H. Y.; Liao, H. Y.; Chen, X.; Wang, S. W.; Cheng, C. W.; Shahed-Al-Mahmud, M.; Liu, Y. M.; Mohapatra, A.; Chen, T. H.; Lo, J. M.; Wu, Y. M.; Ma, H. H.; Chang, Y. H.; Tsai, H. Y.; Chou, Y. C.; Hsueh, Y. P.; Tsai, C. Y.; Huang, P. Y.; Chang, S. Y.; Chao, T. L.; Kao, H. C.; Tsai, Y. M.; Chen, Y. H.; Wu, C. Y.; Jan, J. T.; Cheng, T. R.; Lin, K. I.; Ma, C.; Wong, C. H., Vaccination with SARS-CoV-2 spike protein lacking glycan shields elicits enhanced protective responses in animal models. *Sci Transl Med* **2022**, *14* (639), eabm0899.
6. Tiller, T.; Busse, C. E.; Wardemann, H., Cloning and expression of murine Ig genes from single B cells. *J Immunol Methods* **2009**, *350* (1-2), 183-93.
7. Song, X.; Ju, H.; Lasanajak, Y.; Kudelka, M. R.; Smith, D. F.; Cummings, R. D., Oxidative release of natural glycans for functional glycomics. *Nat Methods* **2016**, *13* (6), 528-534.
